# Supplementary material for: Cumulative Risks of Excipients in Pediatric Phytomucolytic Syrups: The Implications for Pharmacy Practice
Source: MDPI journal article supplement (doi:10.3390/scipharm89030032), 2021-07-05
Supplement: s1 [file s1]

**Table S1.** Analysis of excipients safety in an analyzed sample of pediatric phytomucolytic syrups marketed in Ukraine (n=12)

| Syrup Code | Excipients                                            | E code | Comments and safety concerns                                                                            |
|------------|-------------------------------------------------------|--------|---------------------------------------------------------------------------------------------------------|
| Syrup 01   | Sucrose                                               | –      | Natural sweetener, risk of cariogenicity, high caloricity                                               |
|            | Glycerin                                              | E 422  | Solvent, preservative, in large doses – headache, thirst, nausea, and hyperglycemia                     |
|            | Citric acid monohydrate                               | E 330  | Antioxidant, safe                                                                                       |
|            | Sodium benzoate                                       | E 211  | Preservative, safe                                                                                      |
|            | Sodium methyl parahydroxybenzoate                     | E 219  | Paraben, not approved by FDA IIG <sup>1</sup> (not GRAS <sup>2</sup> ), GSFA <sup>3</sup>               |
|            | Sodium propyl parahydroxybenzoate                     | E 217  | Paraben, not approved by EMA, FDA IIG (not GRAS), GSFA                                                  |
|            | Sorbic acid                                           | E 200  | Preservative, safe                                                                                      |
|            | Brilliant blue FCF                                    | E 133  | Synthetic coloring agent, not approved by FDA IIG, not GRAS, risk of allergic reactions                 |
| Syrup 02   | Sorbitol                                              | E 420  | Sweetener (laxative effect)                                                                             |
|            | Citric acid monohydrate                               | E 330  | Antioxidant, safe                                                                                       |
|            | Sodium citrate                                        | E 331  | Buffering agent, safe                                                                                   |
|            | Potassium sorbate                                     | E 202  | Preservative, safe                                                                                      |
|            | Cherry flavoring agent (solvent – Propylene glycol)   | E 1520 | Flavoring agent with propylene glycol as a solvent, risk of allergic and other negative reactions       |
|            | Xanthan gum                                           | E 415  | Viscosity-increasing agent, not approved by FDA IIG for oral syrups, not GRAS                           |
| Syrup 03   | Sucrose                                               | –      | Sweetener, risk of cariogenicity, high caloricity                                                       |
|            | Methyl parahydroxybenzoate                            | E 218  | Paraben, not approved by GSFA                                                                           |
| Syrup 04   | Sucrose                                               | –      | Natural sweetener, risk of cariogenicity, high caloricity                                               |
|            | Ethanol 8 -11%                                        |        | Solvent, preservative, safe but can be dangerous for young children and risk categories                 |
| Syrup 05   | Sorbitol                                              | E 420  | Sweetener, laxative effect                                                                              |
|            | Glycerine                                             | E 422  | Solvent, preservative, in large doses – headache, thirst, nausea, and hyperglycemia                     |
|            | Sodium benzoate                                       | E 211  | Preservative, safe                                                                                      |
|            | Citric acid monohydrate                               | E 330  | Antioxidant, safe                                                                                       |
|            | Flavor balsam (based on Propylene Glycol and ethanol) | E 1520 | Flavoring agent containing Propylene Glycol and ethanol (risk of allergic and other negative reactions) |
| Syrup 06   | Sucrose                                               | –      | Natural sweetener, risk of cariogenicity, high caloricity                                               |
|            | Methyl parahydroxybenzoate                            | E 218  | Paraben, not approved by GSFA                                                                           |
|            | Flavor                                                | –      | Flavoring agent                                                                                         |
| Syrup 07   | Sucrose                                               | –      | Natural sweetener, risk of cariogenicity, high caloricity                                               |
|            | Methyl parahydroxybenzoate                            | E 218  | Paraben, not approved by GSFA                                                                           |
| Syrup 08   | Sugar syrup                                           | –      | Natural sweetener,                                                                                      |

|          |                               |       |                                                                                  |
|----------|-------------------------------|-------|----------------------------------------------------------------------------------|
|          | Methyl parahydroxybenzoate    | E 218 | risk of cariogenicity, high caloricity<br>Paraben, not approved by GSFA)         |
|          | Propyl parahydroxybenzoate    | E 216 | Paraben, not approved by GSFA                                                    |
| Syrup 09 | Sugar syrup                   | –     | Natural sweetener,<br>risk of cariogenicity, high caloricity                     |
|          | Honey                         | –     | Natural sweetener,<br>risk of allergic reactions                                 |
|          | Potassium sorbate             | E 202 | Preservative, safe                                                               |
|          | Mentha piperita essential oil | –     | Flavor, safe                                                                     |
| Syrup 10 | Sorbitol                      | E 420 | Sweetener, laxative effect                                                       |
|          | Potassium sorbate             | E 202 | Preservative, safe                                                               |
|          | Citric acid anhydrous         | E 330 | Antioxidant, safe                                                                |
|          | Cherry flavoring agent        | –     | Flavoring agent                                                                  |
|          | Xanthan gum                   | E 415 | Viscosity-increasing agent, not approved by<br>FDA IIG for oral syrups, not GRAS |
| Syrup 11 | Maltitol                      | E 965 | Natural-based sweetener, safe                                                    |
|          | Potassium sorbate             | E 202 | Preservative, safe                                                               |
|          | Citric acid monohydrate,      | E 330 | Antioxidant, safe                                                                |
|          | Hydroxypropyl betadex         | –     | Solubilizing agent, safe                                                         |
|          | Ethanol 7%                    |       | Solvent, preservative, safe as it is contained<br>in acceptable amounts          |
| Syrup12  | Xylitol                       | E 967 | Sweetener, risk of a laxative effect                                             |
|          | Citric acid monohydrate       | E 330 | Antioxidant, safe                                                                |
|          | Methyl parahydroxybenzoate    | E 218 | Paraben, not approved by GSFA                                                    |
|          | Propyl parahydroxybenzoate    | E 216 | Paraben, not approved by GSFA                                                    |
|          | Maltodextrine                 | –     | Viscosity-increasing agent, safe                                                 |
|          | Xanthan gum                   | E 415 | Viscosity-increasing agent, not GRAS                                             |
|          | Acacia                        | E 414 | Viscosity-increasing agent, safe                                                 |
|          | Strawberry flavor             | –     | Flavoring agent                                                                  |
|          | Strawberry juice              | –     | Coloring agent                                                                   |

<sup>1</sup> IIG – Inactive Ingredient Guide

<sup>2</sup> GRAS – Substances generally recognized as safe in foods, FDA Food additives database

<sup>3</sup> GSFA – Codex General Standard for Food Additives

**Table S2.** Analysis of excipients safety in an analyzed sample of pediatric phytomucolytic syrups marketed in Germany (n=12)

| Syrup Code | Excipients                                                               | E code | Comments and safety concerns                                                               |
|------------|--------------------------------------------------------------------------|--------|--------------------------------------------------------------------------------------------|
| Syrup 11   | Maltitol                                                                 | E 965  | Natural-based sweetener, safe                                                              |
|            | Potassium sorbate                                                        | E 202  | Preservative, safe                                                                         |
|            | Citric acid monohydrate,                                                 | E 330  | Antioxidant, safe                                                                          |
|            | Hydroxypropyl betadex                                                    | –      | Solubilizing agent, safe                                                                   |
|            | Ethanol 7 %                                                              |        | Solvent, preservative, safe as it is contained in acceptable amounts                       |
| Syrup 12   | Xylitol                                                                  | E 967  | Sweetener, risk of laxative effect                                                         |
|            | Citric acid monohydrate                                                  | E 330  | Antioxidant, safe                                                                          |
|            | Methyl parahydroxybenzoate                                               | E 218  | Paraben, not approved by GSFA                                                              |
|            | Propyl parahydroxybenzoate                                               | E 216  | Paraben, not approved by GSFA                                                              |
|            | Maltodextrine                                                            | –      | Viscosity-increasing agent, safe                                                           |
|            | Xanthan gum                                                              | E 415  | Viscosity-increasing agent, not approved by FDA IIG for oral syrups, not GRAS              |
|            | Acacia                                                                   | E 414  | Viscosity-increasing agent, safe                                                           |
|            | Strawberry flavor                                                        | –      | Flavoring agent                                                                            |
|            | Strawberry juice                                                         | –      | Coloring agent                                                                             |
| Syrup 13   | Sucrose                                                                  |        | Sweetener, risk of cariogenicity, high caloricity                                          |
|            | Methyl parahydroxybenzoate                                               | E 218  | Paraben, not approved by GSFA                                                              |
|            | Propyl parahydroxybenzoate                                               | E 216  | Paraben, not approved by GSFA                                                              |
|            | Ethanol 1,1 %                                                            |        | Solvent, preservative, safe as it is contained in acceptable amounts                       |
| Syrup 14   | Sorbitol                                                                 | E 420  | Sweetener (laxative effect)                                                                |
|            | Citric acid monohydrate                                                  | E 330  | Antioxidant, safe                                                                          |
|            | Sodium citrate                                                           | E 331  | Buffering agent, safe                                                                      |
|            | Potassium sorbate                                                        | E 202  | Preservative, safe                                                                         |
|            | Cherry coloring agent (solvent – Propylene glycol)                       | E 1520 | Coloring agent with propylene glycol as a solvent, risk of allergic and negative reactions |
| Syrup 15   | Sucrose                                                                  | –      | Natural sweetener, risk of cariogenicity, high caloricity                                  |
|            | Ethanol                                                                  |        | Solvent, preservative, safe as it is contained in acceptable amounts                       |
| Syrup 16   | Sorbitol                                                                 |        | Sweetener, laxative effect                                                                 |
|            | Sodium benzoate                                                          | E 211  | Preservative, safe                                                                         |
|            | Ethanol                                                                  |        | Solvent, preservative, safe as it is contained in acceptable amounts                       |
| Syrup 17   | Macrogole glyceryl hydroxystearate (Polyoxyl 40 Hydrogenated Castor Oil) |        | Emulsifier, safe                                                                           |
|            | Anis essential oil                                                       |        | Flavor, safe                                                                               |
|            | Hydroxyethyl cellulose                                                   |        | Stabilizer, thickener, safe approved by GSFA and FDA IIG, not GRAS                         |
|            | Sorbitol                                                                 | E 420  | Sweetener, laxative effect                                                                 |
|            | Propylene Glycol                                                         | E 1520 | Solvent, risk of allergic reactions and other negative reactions                           |
| Syrup 18   | Glycerine                                                                | E 422  | Solvent, preservative, laxative effect                                                     |
|            | Sucrose                                                                  | –      | Sweetener, risk of cariogenicity, high caloricity                                          |

|          |                                                                          |        |                                                                                         |
|----------|--------------------------------------------------------------------------|--------|-----------------------------------------------------------------------------------------|
|          | Propylene Glycol                                                         | E 1520 | Solvent, risk of allergic and other negative reactions                                  |
|          | Sodium saccharin                                                         | E 954  | Sweetener<br>approved by GSFA and FDA IIG, not GRAS, risk of allergic reactions         |
|          | Ethanol                                                                  |        | Solvent, preservative, safe but can be dangerous for young children and risk categories |
| Syrup 19 | Maltitol                                                                 | E 965  | Natural-based sweetener, safe                                                           |
|          | Potassium sorbate                                                        | E 202  | Preservative, safe                                                                      |
|          | Citric acid anhydrous                                                    | E 330  | Antioxidant, safe                                                                       |
|          | Hydroxyethyl cellulose                                                   |        | Stabilizer, thickener, safe                                                             |
|          | Macrogole glyceryl hydroxystearate (Polyoxyl 40 Hydrogenated Castor Oil) |        | approved by GSFA and FDA IIG, not GRAS                                                  |
|          | Propylene Glycol                                                         | E 1520 | Emulsifier, safe                                                                        |
|          | Sucralose                                                                | E 955  | Solvent, risk of allergic and negative reactions                                        |
|          | Honey flavor                                                             |        | Sweetener, approved by FDA IIG, not GRAS<br>Flavor, safe                                |
| Syrup 20 | Maltitol                                                                 | E 965  | Natural-based sweetener, safe                                                           |
|          | Potassium sorbate                                                        | E 202  | Preservative, safe                                                                      |
|          | Xanthan gum                                                              | E 415  | Viscosity-increasing agent, not approved by FDA IIG for oral syrups, not GRAS           |
|          | Herbal essential oils mixture                                            |        | Flavor, safe                                                                            |
| Syrup 21 | Sorbitol                                                                 | E 420  | Sweetener, laxative effect                                                              |
|          | Ethanol                                                                  |        | Solvent, preservative, safe as it is contained in acceptable amounts                    |
| Syrup 22 | Sucrose                                                                  | –      | Natural sweetener, risk of cariogenicity, high caloricity                               |
|          | Ethanol 8,1 %                                                            |        | Solvent, preservative, safe but can be dangerous for young children and risk categories |
|          | Methyl parahydroxybenzoate                                               | E 218  | Paraben, not approved by GSFA                                                           |
|          | Propyl parahydroxybenzoate                                               | E 216  | Paraben, not approved by GSFA                                                           |
|          | Inverted sugar syrup                                                     |        | Natural sweetener, risk of cariogenicity, high caloricity                               |

<sup>1</sup> IIG – Inactive Ingredient Guide

<sup>2</sup> GRAS – Substances generally recognized as safe in foods, FDA Food additives database

<sup>3</sup> GSFA – Codex General Standard for Food Additives
